# Supplementary material for: Multi-parameter vital sign database to assist in alarm optimization for general care units
Source: Springer Nature journal article supplement (doi:10.1007/s10877-015-9790-8), 2015-10-06
Supplement: MOESM1 [file 8910674]

### Supplemental Data

Projected alarm rates (number of alarms/patient/day) from simulations in the cloud-hosted database

#### Threshold - Heart Rate

|           |    | 25  | 35  | 45   | 135  | 145 | 155 |
|-----------|----|-----|-----|------|------|-----|-----|
| delay (s) | 0  | 4.9 | 6.5 | 17.5 | 10.7 | 5.5 | 2.6 |
|           | 5  | 2.4 | 3.3 | 10.2 | 5.0  | 2.3 | 0.9 |
|           | 10 | 1.9 | 2.5 | 7.8  | 3.8  | 1.7 | 0.7 |
|           | 15 | 1.5 | 1.9 | 6.2  | 3.0  | 1.3 | 0.5 |

#### Threshold - Respiratory Rate

|           |     | 2   | 4   | 6   | 30  | 35  | 40  |
|-----------|-----|-----|-----|-----|-----|-----|-----|
| delay (s) | 90  | 0.2 | 0.4 | 1.4 | 2.5 | 0.5 | 0.1 |
|           | 105 | 0.1 | 0.3 | 1.1 | 2.1 | 0.4 | 0.1 |
|           | 120 | 0.1 | 0.3 | 0.9 | 1.8 | 0.3 | 0.0 |
|           | 135 | 0.1 | 0.2 | 0.7 | 1.5 | 0.3 | 0.0 |
|           | 150 | 0.1 | 0.2 | 0.6 | 1.3 | 0.2 | 0.0 |

#### Threshold - SpO2

|           |    | 80  | 85  | 90   |
|-----------|----|-----|-----|------|
| delay (s) | 20 | 0.7 | 4.8 | 42.1 |
|           | 25 | 0.6 | 4.0 | 36.1 |
|           | 30 | 0.6 | 3.7 | 33.7 |
|           | 35 | 0.5 | 3.1 | 29.5 |
|           | 40 | 0.4 | 2.7 | 26.2 |

#### Threshold - cNIBP Systolic

|           |    | 180 | 190 | 200 |
|-----------|----|-----|-----|-----|
| delay (s) | 30 | 2.7 | 1.2 | 0.6 |
|           | 45 | 2.3 | 1.1 | 0.5 |
|           | 60 | 2.0 | 0.9 | 0.4 |
|           | 75 | 1.8 | 0.8 | 0.4 |
|           | 90 | 1.5 | 0.7 | 0.3 |

#### Threshold - cNIBP - MAP

|           |    | 55  | 60  | 65  |
|-----------|----|-----|-----|-----|
| delay (s) | 30 | 0.4 | 1.3 | 3.4 |
|           | 45 | 0.3 | 1.1 | 2.8 |
|           | 60 | 0.3 | 0.9 | 2.5 |
|           | 75 | 0.2 | 0.7 | 2.1 |
|           | 90 | 0.2 | 0.6 | 1.9 |
