# Supplementary material for: Multi-parameter vital sign database to assist in alarm optimization for general care units
Source: Springer Nature journal article supplement (doi:10.1007/s10877-015-9790-8), 2015-10-06

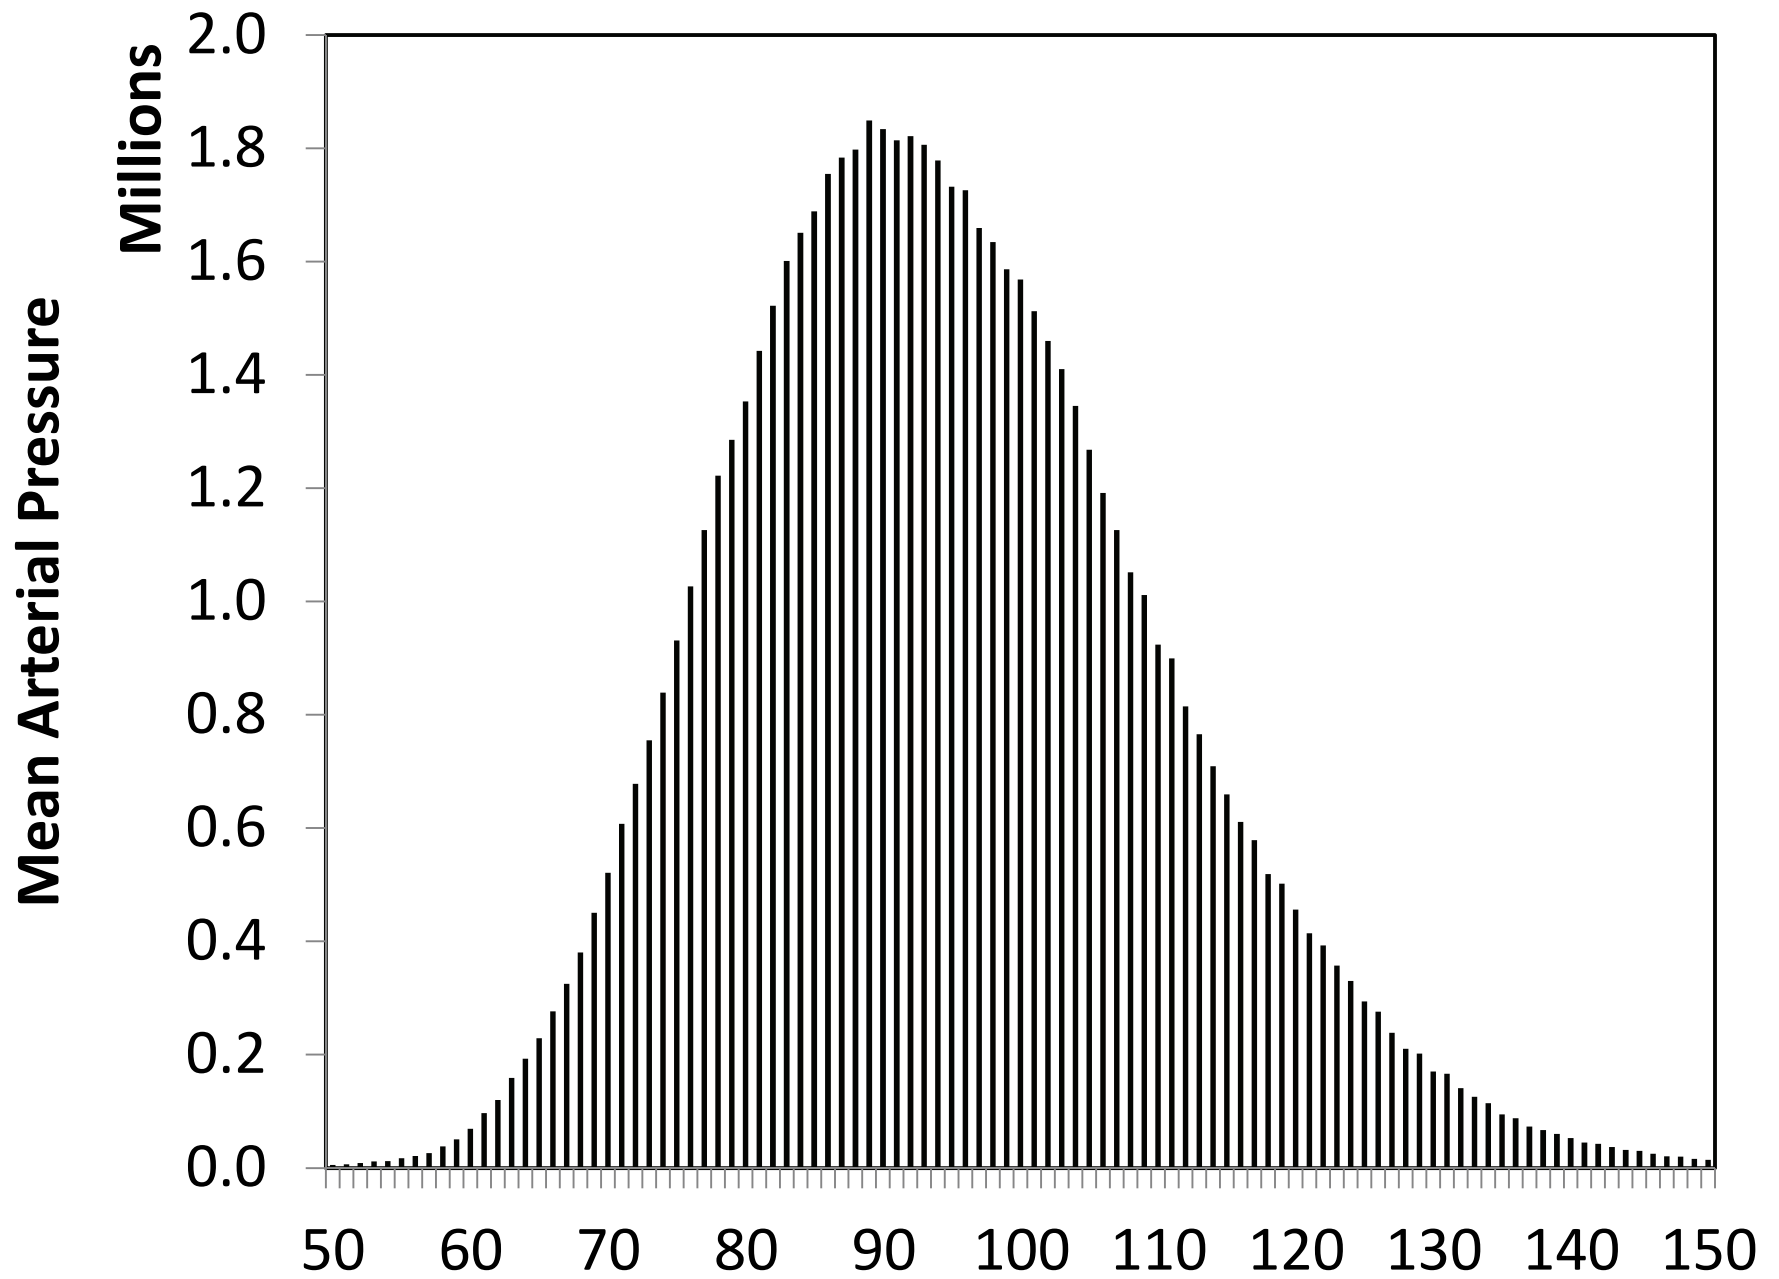

Supplement: MOESM2 [file 8910674]
